# Supplementary material for: Report of the Largest Chinese Cohort With SLC19A3 Gene Defect and Literature Review
Source: Front Genet. 2021 Jul 1;12:683255. doi: 10.3389/fgene.2021.683255 (PMC8281341; doi:10.3389/fgene.2021.683255)
Supplement: Supplementary file 1 [file Table_1.XLSX]

## Sheet: Summary of clinical and genetic
Ref	Reference	ID	ID in reports	Origin	Sex	Clinical category	Age of onset	Age of diagnosis(y)	Age of report		homo/het	Mutation 1	Mutation 2	Consanguinity of the parents	Trigger	Clinical ymptoms	Seizures	Serum-lac	CSF-lac	OXPHOS activity (muscle/skin)	Brainstem	Cerebellum	Basal Ganglia	Thalami	Cortex	Subcortical WM	Deep WM	Other	Post-acute phas-MRI	MRS	Time frame from onset to thearpy	Biotin (mg/kg.d)	Thiamine (mg/kg.d)	Outcome	Sequela
1	Pinar T. Ozand，1998	1	1	Saudi	F	BTBGD	5y	5	15y	0	homo	c.1264G>A, p.T422A	c.1264G>A, p.T422A	Yes	Fever	Stifiness of limbs, loss of motor function, GTCS, coma, oculogyric crisis	GE	Normal	Normal		N	N	Caudate, putamen	Y	Y	Y	Y (internal capsule)	N	—	NA	3mo	5	0	Moderate	Handicap	Slurred speech	N	N	N	N	Supranuclear facial palsy	—
		2	2	Saudi	F	BTBGD	3y	3	9y	0	homo	c.1264G>A, p.T422A	c.1264G>A, p.T422A	Yes	No	Periodic dystonia of hands	N	Normal	Normal		N	N	Y	N	N	N	N	N	—	NA	soon	5	0	Normal	—	—	—	—	—	—	—	—
		3	3	Saudi	F	BTBGD	7y	7.25	15y	0	homo	c.1264G>A, p.T422A	c.1264G>A, p.T422A	Yes	No	Confusion, loss of motor, rigidity of limbes, dystonia, opisthotonus	N	Normal	Normal		—								BG	NA	1mo	5	0	Mild	N	Slurred speech	N	N	N	N	N	—
		4	4	Saudi	M	BTBGD	9y	NA	NA	0	homo	c.1264G>A, p.T422A	c.1264G>A, p.T422A	Yes	No	Episodic dystonia of foot, mild facial diplegia, dysphasia and ataxia, Sz	Y	Normal	Normal		—								BG	NA	NA	100mg/d	600mg/d	Normal	—	—	—	—	—	—	—	—
		5	6	Yemen	M	BTBGD	1y	2	9y	0	homo	c.68G>T，p.G23V	c.68G>T，p.G23V	Yes	No	Loss of milestones, episodic dystonia of limb, tetraparetic, mild rigidity	N	Normal	Normal		—								BG	NA	1y	5	0	Normal	—	—	—	—	—	—	—	—
		6	7	Saudi	M	BTBGD	6y	6	9y	0	homo	c.1264G>A, p.T422A	c.1264G>A, p.T422A	Yes	No	Sudden hemiplegia, left ptosis and supranuclear facial paralysis	N	Normal	Normal		N	N	Y	Y	N	N	N	N	—	NA	1wk	5	0	Moderate	N	N	Y	N	N	N	N	—
5	Satoshi Kono, 2009	7	1	Japan	M	Wernicke's	Adult	NA	20y+	0	heter	c.958G>C, p.E320Q	c.218A>G, p.K44E	No	No	Complexed partial Sz, status epilepticus, ophthalmoplegia, nystagmus, ataxia	Complex PE, SE	NA	NA		Y	N	N	Y	N	N	N	N	—	NA	soon	0	10	Normal	—	—	—	—	—	—	—	—
		8	2	Japan	M	Wernicke's	Adult	NA	20y+	0	heter	c.958G>C, p.E320Q	c.218A>G, p.K44E	No	No	Complexed partial Sz, status epilepticus, ophthalmoplegia, nystagmus, ataxia	Complex PE, SE	NA	NA		Y	N	N	Y	N	N	N	N	—	NA	soon	0	10	Normal	—	—	—	—	—	—	—	—
6	Rabab Debs, 2010	9	1	Portugal	M	BTBGD	7y	31	33y	2	heter	c.74dupT, p.S26LfsX19	c.980-14A>G, p.G327NfsX8	No	Benign ilness	Confusion, loss of motor and speech, dysphagia, Sz, gaze palsy, ptosis, generalized dystonia, mutism	GE	Normal	Normal	Normal	Y	N	Caudate, putamen	N	Y	Y	N	N	BG	NA	24y	5~10	0	Improved	—	—	—	—	—	—	—	—
		10	2	Portugal	F	BTBGD	12y	29	29y	2	heter	c.74dupT, p.S26LfsX19	c.980-14A>G, p.G327NfsX8	No	No	Simple partial Sz at 12y; 20y: Generalized Sz, ataxia, central gaze nystagmus, loss of ambulation, dysphagia, dysarthria, generalized dystonia	PE, GE	Normal	Normal	Normal	N	N	Caudate, putamen	N	Y	Y	N	N	BG	NA	17y	5~10	10	Improved	—	—	—	—	—	—	—	—
7	Kenichiro Yamada, 2010	11	1	Japan	M	Infantile spasms	2mo	NA	18y	0	homo	c.958G>C, p.E320Q	c.958G>C, p.E320Q	Yes	No	Opisthotonus, epileptic spasms, severe mental retardation, spastic quardriplegia, dysphagia, severe tonic Sz daily	Spasms, GE	NA	NA	Normal	N	N	Y	Y	N	N	N	N	Brain atrophy, BG	NA	NP	No	No	Severe	Quardriplegia	Y	N	N	N	Y	Dysphagia	—
		12	2	Japan	M	Infantile spasms	3mo	After death	12y(dead)	0	homo	c.958G > C, p.E320Q	c.958G>C, p.E320Q	Yes	No	Bad temper, developmental delay, mental retardation, dysphagia, quadriplegia, epileptic spasms, symptomatic generalized seizures	Spasms, GE	NA	NA		—								Brain atrophy, BG	NA	NP	No	No	Death	—	—	—	—	—	—	—	Respiratory failure
		13	3	Japan	M	Infantile spasms	2mo	After death	9y(dead)	0	homo	c.958G > C, p.E320Q	c.958G > C, p.E320Q	Yes	No	Quite similar to P11 and P12	Spasms, GE	NA	NA		—								Brain atrophy, BG	NA	NP	No	No	Death	—	—	—	—	—	—	—	Respiratory failure
		14	4	Japan	M	Infantile spasms	11mo	NA	6y	0	homo	c.958G > C, p.E320Q	c.958G > C, p.E320Q	Yes	No	Quite similar to P11 and P12	Spasms, PE	NA	NA		—								Brain atrophy, BG	NA	17mo	5	0	Severe	Quardriplegia	Y	Y	Y	N	N	Hypotonia, dysphagia	—
8	Mercedes Serrano, 2012	15	1	Spain	M	BTBGD	8y	20	20y	2	heter	c.74dupT, p.S26LfsX19	c.980-14A>G, p.G327NfsX8	No	Acute gastroenteritis; vigorous physical exercise; mild trauma	8y: Coma triggered by gastroenteritis; dystonia storm, confusion, speech impairment 15y: short lasting episodes of cephalic tremor and nystagmus induced by vigorous physical exercise	N	Normal	Normal	Normal	—								BG	NA	9y	0	10~15	Mild	N	Y	N	Mild dystonia of limbs	N	N	N	—
		16	2	Spain	F	BTBGD	4y	6	6y	2	heter	c.74dupT, p.S26LfsX19	c.980-14A>G, p.G327NfsX8	No	No	Epsiodic dystonia of limbs, progressed into generalized dystonia, confusion, loss of sphincter control, anarthria, and dysphagia in 1 year	N	Normal	Normal		N	N	Y	Y	Y	Y	N	N	Complete resolution	Increased lactate peak and decreased NAA peak	2y	0	10~15	Normal	—	—	—	—	—	—	—	—
10	Brahim Tabarki, 2013	17	1	Saudi	F	BTBGD	8y	NA	NA	0	homo	c. 1264A>G, p.T422A	c. 1264A>G, p.T422A	Yes	Yes	SAE, ataxia, Sz	Y	Normal	Normal		Y	Y	Y	Y	Y	Y	N	N	—	4/4 increased lactate peak and decreased NAA peak	NA	2~3	100~300/d	Mild	N	Y	N	Y	N	N	N	—
		18	2	Saudi	F	BTBGD	3.5y	NA	NA	0	homo	c. 1264A>G, p.T422A	c. 1264A>G, p.T422A	Yes	Yes	SAE, ataxia, dystonia	N	Normal	Normal		N	Y	Y	Y	Y	Y	N	N	—		NA	2~3	100~300/d	Normal	—	—	—	—	—	—	—	—
		19	3	Saudi	M	BTBGD	4y	NA	NA	0	homo	c. 1264A>G, p.T422A	c. 1264A>G, p.T422A	Yes	Yes	SAE, ataxia, mutism, Sz	Y	Normal	Normal		Y	Y	Y	Y	Y	Y	N	N	—		NA	2~3	100~300/d	Normal	—	—	—	—	—	—	—	—
		20	4	Saudi	M	BTBGD	7.5y	NA	NA	0	homo	c. 1264A>G, p.T422A	c. 1264A>G, p.T422A	Yes	Yes	SAE, ataxia, dystonia, dysphagia, Sz	Y	Normal	Normal		Y	Y	Y	Y	Y	Y	N	N	—		NA	2~3	100~300/d	Mild	N	Y	N	Y	Y	N	N	—
		21	5	Saudi	M	BTBGD	3y	NA	NA	0	homo	c. 1264A>G, p.T422A	c. 1264A>G, p.T422A	Yes	Yes	SAE, ataxia, dystonia	N	Normal	Normal		N	N	Y	Y	N	N	N	N	—		NA	2~3	100~300/d	Normal	—	—	—	—	—	—	—	—
		22	6	Saudi	F	BTBGD	6y	NA	NA	0	homo	c. 1264A>G, p.T422A	c. 1264A>G, p.T422A	Yes	No	SAE, ataxia, dystonia, dysarthria, Sz	Y	Normal	Normal		N	N	Y	Y	Y	Y	N	N	—		NA	2~3	100~300/d	Mild	N	Y	N	N	Mild	N	N	—
		23	7	Saudi	M	BTBGD	11y	NA	NA	0	homo	c. 1264A>G, p.T422A	c. 1264A>G, p.T422A	Yes	No	SAE, dystonia, Sz	Y	Normal	Normal		N	Y	Y	N	Y	Y	N	N	—		NA	2~3	100~300/d	Normal	—	—	—	—	—	—	—	—
		24	8	Saudi	M	BTBGD	12y	NA	NA	0	homo	c. 1264A>G, p.T422A	c. 1264A>G, p.T422A	No	No	SAE, ataxia, dystonia, dysarthria, Sz	Y	Normal	Normal		Y	Y	Y	Y	Y	Y	N	N	—		NP	No	No	Death	—	—	—	—	—	—	—	NA
		25	9	Saudi	F	BTBGD	3y	NA	NA	0	homo	c. 1264A>G, p.T422A	c. 1264A>G, p.T422A	No	No	Severe dystonia of the face and limbs, Sz	Y	Normal	Normal		—								—		NA	2~3	100~300/d	Moderate	N	N	N	Y	N	N	N	—
		26	10	Saudi	F	BTBGD	12y	12	NA	0	homo	c. 1264A>G, p.T422A	c. 1264A>G, p.T422A	Yes	No	Acute encephalopathy, Sz	Y	Normal	Normal		Y	Y	Y	Y	Y	Y	N	N	—		1mo	2~3	100~300/d	Severe	Quardriplegia	N	N	N	N	N	N	—
11	Belén Pérez-Dueñas，2013	27	1	Morocco	M	Neonatal lactic acidosis	1mo	After death	6mo	0	homo	c.68G>T, p.G23V	c.68G>T, p.G23V	Yes	No	Poor feeding, vomiting, irritability; progressed into lethargy, intermittent opisthotonus, lactic acidosis	N	Increased	Increased		N	N	Y	Y	Y	Y	N	N	BG	A mild lactate peak	1mo	~5 at first, then stop	~20	Death	—	—	—	—	—	—	—	—
12	Mike Gerards, 2013	28	1	Morocco	M	Leigh-like	1mo	After death	2mo(Dead)	2	homo	c.20C>A, p.Ser7X	c.20C>A, p.Ser7X	Yes	No	Opisthotonus, inconsolable crying and roving eye movements, Sz, hypotonia with hyperreflexia, feeding difficulties, apnoea and abnormal breathing pattern	Y	Increased	Normal	Normal	—								—	NA	NP	No	No	Death	—	—	—	—	—	—	—	Apnoeas and Cheyne-Stokes type of breathing
		29	2	Morocco	M	Leigh-like	1mo	After death	2mo(Dead)	2	homo	c.20C>A, p.Ser7X	c.20C>A, p.Ser7X	Yes	No	Convulsions, nystagmus, hypotonia, sun-set phenomenon, respiratory failure	N	Increased	Normal	decreased activity of complex IV	Y	Y	Y	Y	Y	Y	N	N	—	Lactate peak	NP	No	No	Death	—	—	—	—	—	—	—	Respiratory failure
		30	3	Morocco	M	Leigh-like	3wks	After death	1.5mo(Dead)	2	homo	c.20C>A, p.Ser7X	c.20C>A, p.Ser7X	Yes	No	Poor feeding, opisthotonus, roving eye movements, hypotonia with hyperreflexia, abnormal breathing pattern	N	Increased	Normal		—								—	NA	NP	No	No	Death	—	—	—	—	—	—	—	Progressive abnormal breathing pattern
		31	4	Morocco	F	Leigh-like	1mo	After death	2mo(Dead)	2	homo	c.20C>A, p.Ser7X	c.20C>A, p.Ser7X	Yes	No	Irritability, jitteriness, poor feeding, respiratory insufficient, hypertonia-hypotonia	N	NA	NA		—								—	NA	NP	No	No	Death	—	—	—	—	—	—	—	Progressive neurological deterioration
		32	5	Morocco	F	Leigh-like	1mo	After death	2mo(Dead)	2	homo	c.20C>A, p.Ser7X	c.20C>A, p.Ser7X	Yes	No	Poor feeding, abnormal breathing pattern, Sz, hypotonia, ptosis	Y	Increased	Increased		—								—	NA	NP	No	No	Death	—	—	—	—	—	—	—	NA
		33	6	Morocco	M	Leigh-like	1mo	After death	Soon died	2	homo	c.20C>A, p.Ser7X	c.20C>A, p.Ser7X	Yes	No	Hypo-and hypertonia, irritable, failure to thrive, episodic opisthotonus	N	NA	NA	Reduced oxygen consumption	—								—	NA	NP	No	No	Death	—	—	—	—	—	—	—	Cheyne-Stokes respiration
		34	7	Morocco	M	Leigh-like	1mo	After death	Soon died	2	homo	c.20C>A, p.Ser7X	c.20C>A, p.Ser7X	Yes	No	Not mentioned	NA	NA	NA	Reduced oxygen consumption	—								—	NA	NP	No	No	Death	—	—	—	—	—	—	—	Respiratory failure and an abnormal breathing pattern
		35	8	Morocco	M	Leigh-like	1mo	After death	20y(Dead)	2	homo	c.20C>A, p.Ser7X	c.20C>A, p.Ser7X	No	No	Not mentioned	NA	NA	NA		—								—	NA	NP	No	No	Death	—	—	—	—	—	—	—	Respiratory tract infections
		36	9	Morocco	M	Leigh-like	1mo	After death	15y(Dead)	2	homo	c.20C>A, p.Ser7X	c.20C>A, p.Ser7X	No	No	Hypertonia, crying inconsolably, Sz, feeding difficulties, recurrent respiratory tract infections	Y	NA	NA	Normal	—								Brain atrophy, abnormal signals at BG, Cerebellum, thalamus, periaquaductal region, subcortical cysts, thin corpus callosum	NA	NP	No	No	Death	—	—	—	—	—	—	—	Respiratory tract infections
13	Felix Distelmaier, 2013	37	1	Morocco	F	BTBGD	3.5y	6	6y	0	homo	c.1264G>A, p.T422A	c.1264G>A, p.T422A	No	No	Somnolence, dystonia, and dysarthria	N	Normal	Normal		N	N	Y	Y	Y	Y	N	N	BG	Y	3.5y	10	5	Improved	—	—	—	—	—	—	—	—
14	Elisa Fassone, 2013	38	1	India	F	BTBGD	8y	15	15.5y	0	homo	c.517A>G, p.N173D	c.517A>G, p.N173D	No	Fatigue	Rapid onset ptosis, progressive ophthalmoplegia, fatigue, progressed into abnormal behaviour, dysphagia, dysuria, dysarthria at 15y	N	Normal	Normal		Y	N	Y	N	N	N	N	N	Complete resolution	NA	7y	5	5	Improved	—	—	—	—	—	—	—	—
15	Sietske H. Kevelam, 2013	39	1	Canada	F	Leigh-like	2.5mo	After death	15.6mo (Dead)	1	heter	c.68G>T, p.G23V	c.1173_1314del, p.Q393X	No	No	Irritability, loss of smile and social interaction, loss of head control, feeding difficulties, failure to thrive; ventilator support	N	Increased	Borderline	3/7 Reduced activity of one or more respiratory chain enzyme complexes	Y	Y	Y	Y	Y	Y	N	N	—	5/5 lactate peak	NA	Yes	No	Death	—	—	—	—	—	—	—	Respiratory failure
		40	2	European	F	Leigh-like	2.5mo	After death	4mo(Dead)	0	heter	c.541T>C, p.S181P	c.1154T>G, p.L385R	Yes	Vaccination	Irritability, arching posture	N	Increased	Increased		—										NP	No	No	Death	—	—	—	—	—	—	—	Respiratory failure
		41	3	European	M	Leigh-like	2mo	After death	12mo(Dead)	1	heter	c.507C>G p.Y169X	c.527C>A p.S176Y	No	Respiratory tract infection	Irritability, infantile spasms, feeding difficulties	N	Increased	Normal		—								—		NA	Yes	No	Death	—	—	—	—	—	—	—	Respiratory failure
		42	4	European	F	Leigh-like	3mo	After death	11mo(Dead)	0	heter	c.541T>C, p.S181P	c.1154T>G, p.L385R	Yes	Vaccination	Irritability, loss of milestones, suspect seizures, ventilator support	N	Increased	NA		—								—		NP	No	No	Death	—	—	—	—	—	—	—	Respiratory failure
		43	5	Lebanon	F	Leigh-like	2mo	After death	18mo(Dead)	2	homo	c.895_925del p.V299fsX	c.895_925del p.V299fsX	Yes	Infection	Developmental delay, loss of eye contact, lethargy, seizures, ventilator support	Y	Normal	Normal		Y	Y	Y	Y	Y	Y	N	N	Brain atrophy, BG		NP	No	No	Death	—	—	—	—	—	—	—	Respiratory failure
		44	6	Morocco	M	Leigh-like	2mo	After death	58mo(Dead)	0	homo	c.1332C>G p.S444R	c.1332C>G p.S444R	Yes	Vaccination	Irritability, loss of eye contact, myoclonic jerks	N	Increased	Normal		—								Brain atrophy, BG		NP	No	No	Death	—	—	—	—	—	—	—	Respiratory failure
		45	7	Lebanon	M	Leigh-like	5.5mo	After death	20mo(Dead)	2	homo	c.895_925del p.V299fsX	c.895_925del p.V299fsX	Yes	Infection	Irritability, lethargy, developmental delay, suspected seizures, ventilator support	Y	Normal	Normal		—								Brain atrophy, BG		NP	No	No	Death	—	—	—	—	—	—	—	Respiratory failure
16	Majid Alfadhel, 2013	46	1	Saudi	M	BTBGD	3.5y	NA	5y	0	homo	c. 1264A>G, p.T422A	c. 1264A>G, p.T422A	No	Yes	SAE, ataxia, dysarthria, dystonia	Y	Normal	Normal		4/13 individuals	4/14 individuals	13/13 individuals	4/13 individuals	13/13 individuals	13/13 individuals	N	spine (1/13)	necrosis and atrophy of basal gangli (13/13),	NA	Soon	7	400mg/d	Normal	—	—	—	—	—	—	—	—	6/18 patients had a recurrence of acute crises while on biotin alone, no recurrences after addition of thiamine
		47	2	Saudi	F	BTBGD	4mo	NA	15mo	0	homo	c. 1264A>G, p.T422A	c. 1264A>G, p.T422A	Yes	Yes	SAE, loose mile stones	Y	Normal	Normal											NA	Soon	10	400mg/d	Normal	—	—	—	—	—	—	—	—
		48	3	Saudi	M	BTBGD	1y	NA	4y	0	homo	c. 1264A>G, p.T422A	c. 1264A>G, p.T422A	Yes	Yes	SAE, loose mile stones, dystonia	Y	Normal	Normal											NA	Soon	10	400mg/d	Normal	—	—	—	—	—	—	—	—
		49	4	Saudi	M	BTBGD	7y	NA	10y	0	homo	c. 1264A>G, p.T422A	c. 1264A>G, p.T422A	Yes	Yes	SAE, ataxia, dysarthria, dystonia	Y	Normal	Normal											NA	Soon	7	300mg/d	Moderate	Moderate motor deficit	Y	N	N	N	N	N	—
		50	5	Saudi	M	BTBGD	2y	NA	23y	0	homo	c. 1264A>G, p.T422A	c. 1264A>G, p.T422A	Yes	Yes	SAE, ataxia, dysarthria, dystonia	Y	Normal	Normal											NA	5y	5	200mg/d	Mild	Mild motor deficit	Mild	N	N	N	N	N	—
		51	6	Saudi	M	BTBGD	4y	NA	26y(Dead)	0	homo	c. 1264A>G, p.T422A	c. 1264A>G, p.T422A	Yes	Yes	SAE, ataxia, dysarthria, dystonia	Y	Normal	Normal											NA	8y	5	0	Death	—	—	—	—	—	—	—	NA
		52	7	Saudi	F	BTBGD	4y	NA	11y	0	homo	c. 1264A>G, p.T422A	c. 1264A>G, p.T422A	Yes	Yes	SAE, ataxia, dysarthria, dystonia	Y	Normal	Normal											NA	3mo	5	200mg/d	Moderate	Moderate motor deficit	Moderate	N	N	N	N	N	—
		53	8	Saudi	F	BTBGD	2y	NA	9y	0	homo	c. 1264A>G, p.T422A	c. 1264A>G, p.T422A	Yes	Yes	GDD since birth then SAE, ataxia, dysarthria, dystonia	Y	Normal	Normal											NA	3y	5	300mg/d	Severe	Spastic quardriplegia	N	N	N	N	N	N	—
		54	9	Saudi	M	BTBGD	14mo	NA	14y	0	homo	c. 1264A>G, p.T422A	c. 1264A>G, p.T422A	Yes	Yes	SAE, loose mile stones	Y	Normal	Normal											NA	3mo	10	300mg/d	Mild	Mild motor deficit	Mild	N	N	N	N	N	—
		55	10	Saudi	F	BTBGD	5mo	NA	11y	0	homo	c. 1264A>G, p.T422A	c. 1264A>G, p.T422A	Yes	Yes	SAE, loose mile stones, dystonia	Y	Normal	Normal											NA	1y	10	300mg/d	Severe	Spastic quardriplegia	N	N	N	N	N	N	—
		56	11	Saudi	M	BTBGD	3y	NA	4y (Dead)	0	homo	c. 1264A>G, p.T422A	c. 1264A>G, p.T422A	Yes	Yes	SAE, ataxia, dysarthria, loose mile stones	Y	Normal	Normal											NA	NP	No	No	Death	—	—	—	—	—	—	—	NA
		57	12	Saudi	F	BTBGD	3y	NA	4y	0	homo	c. 1264A>G, p.T422A	c. 1264A>G, p.T422A	Yes	Yes	SAE, loose mile stones	Y	Normal	Normal											NA	Soon	10	300mg/d	Normal	—	—	—	—	—	—	—	—
		58	13	Saudi	F	BTBGD	3y	NA	4y	0	homo	c. 1264A>G, p.T422A	c. 1264A>G, p.T422A	Yes	Yes	SAE, ataxia, dysarthria, loose mile stones	Y	Normal	Normal											NA	Soon	10	300mg/d	Normal	—	—	—	—	—	—	—	—
		59	14	Saudi	M	BTBGD	4y	NA	6y	0	homo	c. 1264A>G, p.T422A	c. 1264A>G, p.T422A	Yes	Yes	SAE, ataxia, dysarthria, dystonia	N	Normal	Normal											NA	3mo	10	300mg/d	Mild	Mild motor deficit	Mild	N	N	N	N	N	—
		60	15	Saudi	M	BTBGD	3y	After death	3.5y(Dead)	0	homo	c. 1264A>G, p.T422A	c. 1264A>G, p.T422A	Yes	Yes	SAE, ataxia, dysarthria, dystonia	N	Normal	Normal											NA	NP	No	No	Death	—	—	—	—	—	—	—	NA
		61	16	Saudi	F	BTBGD	11y	NA	13y	0	homo	c. 1264A>G, p.T422A	c. 1264A>G, p.T422A	Yes	Yes	SAE, ataxia, dysarthria, dystonia	N	Normal	Normal											NA	1.5y	8~10	300mg/d	Mild	N	Mild	N	N	N	N	N	—
		62	17	Saudi	F	BTBGD	2y	NA	2y	0	homo	c. 1264A>G, p.T422A	c. 1264A>G, p.T422A	Yes	No	SAE, ataxia	N	Normal	Normal											NA	Soon	8~10	300mg/d	Normal	—	—	—	—	—	—	—	—
		63	18	Saudi	F	BTBGD	2y	NA	2y, 9mo (Dead)	0	homo	c. 1264A>G, p.T422A	c. 1264A>G, p.T422A	Yes	Yes	SAE, ataxia	N	Normal	Normal											NA	NP	No	No	Death	—	—	—	—	—	—	—	NA
17	H. Kassem, 2014	64	1	Middle East	M	BTBGD	3y	NA	NA	0	homo	c.1264G>A, p.T422A	c. 1264A>G, p.T422A	Yes	Yes	SAE	NA	Normal	Normal		N	2/18 individuals	18/18	12/18 individuals	15/18 individuals	15/18 individuals	8/18 individuals	N	—	6/6 lactate peak and decreased NAA peak	NA	5~10	100-300mg/d	Normal	—	—	—	—	—	—	—	—
		65	2	Middle East	M	BTBGD	4y	NA	NA	0	homo	c.1264G>A, p.T422A	c. 1264A>G, p.T422A	Yes	Yes	SAE	NA	Normal	Normal		Y								—		NA	5~10	100-300mg/d	Normal	—	—	—	—	—	—	—	—
		66	3	Middle East	F	BTBGD	8y	NA	NA	0	homo	c.1264G>A, p.T422A	c. 1264A>G, p.T422A	Yes	No	SAE	NA	Normal	Normal		Y								—		NA	5~10	100-300mg/d	Normal	—	—	—	—	—	—	—	—
		67	4	Middle East	F	BTBGD	2.5y	NA	NA	0	homo	c.1264G>A, p.T422A	c. 1264A>G, p.T422A	Yes	No	SAE	NA	Normal	Normal		Y								—		NA	5~10	100-300mg/d	Normal	—	—	—	—	—	—	—	—
		68	5	Middle East	M	BTBGD	7.5y	NA	NA	0	homo	c.1264G>A, p.T422A	c. 1264A>G, p.T422A	Yes	No	SAE	NA	Normal	Normal		Y								—		NA	5~10	100-300mg/d	Mild	N	Y	N	Y	N	N	N	—
		69	6	Middle East	F	BTBGD	2y	NA	NA	0	homo	c.1264G>A, p.T422A	c. 1264A>G, p.T422A	Yes	Yes	AE	NA	Normal	Normal		N								—		NP	No	No	Death	—	—	—	—	—	—	—	Severe encephalopathy, coma, cardiac arrest and rhabdomyolysis
		70	7	Middle East	F	BTBGD	11y	NA	NA	0	homo	c.1264G>A, p.T422A	c. 1264A>G, p.T422A	Yes	No	SAE	NA	Normal	Normal		Y								—		NA	5~10	100-300mg/d	Normal	—	—	—	—	—	—	—	—
		71	8	Middle East	F	BTBGD	8y	NA	NA	0	homo	c.1264G>A, p.T422A	c. 1264A>G, p.T422A	Yes	Yes	SAE	NA	Normal	Normal		Y								—		NA	5~10	100-300mg/d	Normal	—	—	—	—	—	—	—	—
		72	9	Middle East	M	BTBGD	10y	NA	NA	0	homo	c.1264G>A, p.T422A	c. 1264A>G, p.T422A	Yes	Yes	SAE	NA	Normal	Normal		Y								—		NA	5~10	100-300mg/d	Normal	—	—	—	—	—	—	—	—
		73	10	Middle East	F	BTBGD	4.5y	NA	NA	0	homo	c.1264G>A, p.T422A	c. 1264A>G, p.T422A	Yes	Yes	SAE	NA	Normal	Normal		Y								—		NA	5~10	100-300mg/d	Normal	—	—	—	—	—	—	—	—
		74	11	Middle East	M	BTBGD	7.5y	NA	NA	0	homo	c.1264G>A, p.T422A	c. 1264A>G, p.T422A	Yes	No	SAE	NA	Normal	Normal		Y								—		NA	5~10	100-300mg/d	Normal	—	—	—	—	—	—	—	—
		75	12	Middle East	F	BTBGD	6y	NA	NA	0	homo	c.1264G>A, p.T422A	c. 1264A>G, p.T422A	No	No	SAE	NA	Normal	Normal		N								—		NA	5~10	100-300mg/d	Normal	—	—	—	—	—	—	—	—
		76	13	Middle East	M	BTBGD	5y	NA	NA	0	homo	c.1264G>A, p.T422A	c. 1264A>G, p.T422A	No	Yes	SAE	NA	Normal	Normal		Y								—		NA	5~10	100-300mg/d	Normal	—	—	—	—	—	—	—	—
		77	14	Middle East	F	BTBGD	4y	NA	NA	0	homo	c.1264G>A, p.T422A	c. 1264A>G, p.T422A	No	No	SAE	NA	Normal	Normal		Y								—		NA	5~10	100-300mg/d	Mild	N	Y	N	Y	N	N	N	—
		78	15	Middle East	F	BTBGD	8y	NA	NA	0	homo	c.1264G>A, p.T422A	c. 1264A>G, p.T422A	No	No	AE	NA	Normal	Normal		Y								—		NA	5~10	100-300mg/d	Normal	—	—	—	—	—	—	—	—
18	Anne Schänzer, 2014	79	1	German	M	BTBGD	3.5y	9	9y	1	heter	c.280T>C, p.W94R	exon 5 del	No	Infection	Somnolence and generalized dystonia, prgoressed to coma, hypoventilation, mutifocal Sz and epilepsia partialis continua, severe rigidity and dystonic tetraparesis, profound mental retardation and drug-resistant epilepsy	Mutical focal Sz, SE	Normal	Normal		N	N	Y	N	Y	Y	N	N	BG,brain atrophy	NA	6.5y	7	100mg/d	Improved	—	—	—	—	—	—	—	—
		80	2	German	M	BTBGD	9.5y	After death	9y7mo(Dead)	1	heter	c.280T>C, p.W94R	exon 5 del	No	No	9.5y: Episodic facial dyskinesia and dysarthria, resolved completely; 13.5y: confusion, oral dyskinesia, dysarthria, generalized dystonia, rigidity, hypoventilation, dysphagia, coma, epilepsia partialis continua, deceased 4wks after onset	SE	Normal	Normal		N	N	Y	Y	N	N	N	N	BG	Lactate peak	NP	No	No	Death	—	—	—	—	—	—	—	Respiratory failure caused by status epilepticus in combination with aspiration pneumonia
19	L.J. Sremba, 2014	81	1	Mexico	F	Infantile spasms	1.5 mo	0.2	12y(dead)	2	heter	c.74dupT, p.S26LfsX19	c.81_82dup, p.M28fsX	No	No	Regression,lethargy, hypotonia, poor feeding, infantile spasms, nystagmus, episodes of apnea requiring mechanical ventilation, elevated lactate; then with myoclonic-like Sz and spasms	Myoclonic Sz, spasms	Increased	Normal	Normal	Y	Y	Y	Y	Y	Y	N	N	Brain atrophy, BG, cerebeller	Lactate peak	<1mo	0	10mg/kg.d	Death	—	—	—	—	—	—	—	Respiratory failure
20	Tobias B. Haack, 2014	82	2	Turky	M	Leigh-like	18d	NA	4mo	2	homo	c.982delG, p.A328LfsX10	c.982delG, p.A328LfsX10	Yes	No	Irritability, Sz, vomiting, elevated lactate	Y	Increased	Increased	Reduced mitochondrial ATP production rate, no disturbance of respiartory chain complex	Y	Y	Y	Y	Y	Y	N	N	Complete resolution of lesions, with frontotemporal brain atrophy	Lactate peak	<1mo	10	15	Normal	—	—	—	—	—	—	—	—
21	Brahim Tabarki, 2015	83	1	Saudi	F	BTBGD	8y	NA	NA	0	homo	c.1264G>A, p.T422A	c.1264G>A, p.T422A	NA	NA	SAE, ataxia, Sz	Y	NA	NA		Y	Y	Y	Y	Y	Y	N	N	—	NA	No delay	5	40	Mild	N	Y	N	Y	N	N	N	—
		84	2	Saudi	F	BTBGD	3.5y	NA	NA	0	homo	c.1264G>A, p.T422A	c.1264G>A, p.T422A	NA	NA	SAE, ataxia, dystonia	N	NA	NA		N	N	Y	Y	Y	Y	N	N	—	NA	No delay	5	40	Normal	—	—	—	—	—	—	—	—
		85	3	Saudi	M	BTBGD	4y	NA	NA	0	homo	c.1264G>A, p.T422A	c.1264G>A, p.T422A	NA	NA	SAE, ataxia	Y	NA	NA		N	N	Y	Y	Y	Y	N	N	—	NA	No delay	5	40	Normal	—	—	—	—	—	—	—	—
		86	4	Saudi	M	BTBGD	7.5y	NA	NA	0	homo	c.1264G>A, p.T422A	c.1264G>A, p.T422A	NA	NA	mutism，Sz, SAE, ataxia, dystonia	Y	NA	NA		Y	Y	Y	Y	Y	Y	N	N	—	NA	No delay	5	40	Mild	N	Y	N	Y	N	N	N	—
		87	5	Saudi	M	BTBGD	3y	NA	NA	0	homo	c.1264G>A, p.T422A	c.1264G>A, p.T422A	NA	NA	SAE, ataxia, dystonia	N	NA	NA		N	N	Y	Y	Y	Y	N	N	—	NA	No delay	5	40	Normal	—	—	—	—	—	—	—	—
		88	6	Saudi	F	BTBGD	6y	NA	NA	0	homo	c.1264G>A, p.T422A	c.1264G>A, p.T422A	NA	NA	SAE, ataxia, dystonia, Sz, dysarthria	Y	NA	NA		N	N	Y	Y	Y	Y	N	N	—	NA	No delay	5	40	Mild	N	Y	N	Y	N	N	N	—
		89	7	Saudi	M	BTBGD	11y	NA	NA	0	homo	c.1264G>A, p.T422A	c.1264G>A, p.T422A	NA	NA	SAE, dystonia, Sz	Y	NA	NA		N	Y	Y	Y	Y	Y	N	N	—	NA	No delay	5	40	Mild	N	Y	N	Y	N	N	N	—
		90	8	Saudi	M	BTBGD	9y	NA	NA	0	homo	c.1264G>A, p.T422A	c.1264G>A, p.T422A	NA	NA	Acute, Sz	Y	NA	NA		Y	Y	Y	Y	Y	Y	N	N	—	NA	No delay	5	40	Mild	N	Y	N	Y	N	N	N	—
		91	9	Saudi	F	BTBGD	1y	NA	NA	0	homo	c.1264G>A, p.T422A	c.1264G>A, p.T422A	NA	NA	SAE, Sz	Y	NA	NA		N	Y	Y	Y	Y	Y	N	N	BG, brain atrophy	NA	Delayed	5	40	Severe	Spastic quardriplegia	NA	NA	NA	NA	NA	NA	—
		92	10	Saudi	F	BTBGD	12y	NA	NA	0	homo	c.1264G>A, p.T422A	c.1264G>A, p.T422A	NA	NA	Acute, Sz, dystonia	Y	NA	NA		Y	Y	Y	Y	Y	Y	N	N	BG, brain atrophy	NA	Delayed	5	40	Severe	Spastic quardriplegia	NA	NA	NA	NA	NA	NA	—
		93	g2-1	Saudi	F	BTBGD	11y	NA	NA	0	homo	c.1264G>A, p.T422A	c.1264G>A, p.T422A	NA	NA	SAE, Sz	Y	NA	NA		N	Y	Y	Y	Y	Y	N	N	—	NA	No delay	0	40	Mild	N	Y	N	Y	N	N	N	—
		94	g2-2	Saudi	M	BTBGD	1.5y	NA	NA	0	homo	c.1264G>A, p.T422A	c.1264G>A, p.T422A	NA	NA	SAE, Sz	Y	NA	NA		Y	Y	Y	Y	Y	Y	N	N	BG, brain atrophy, ventriculomegaly	NA	Delayed	0	40	Severe	Spastic quardriplegia	NA	NA	NA	NA	NA	NA	—
		95	g2-3	Saudi	M	BTBGD	2y	NA	NA	0	homo	c.1264G>A, p.T422A	c.1264G>A, p.T422A	NA	NA	SAE, Sz	Y	NA	NA		N	Y	Y	Y	Y	Y	N	N	BG, brain atrophy	NA	Delayed	0	40	Severe	Spastic quardriplegia	NA	NA	NA	NA	NA	NA	—
		96	g2-4	Saudi	F	BTBGD	12y	NA	NA	0	homo	c.1264G>A, p.T422A	c.1264G>A, p.T422A	NA	NA	SAE, Sz, dystonia	Y	NA	NA		N	N	Y	Y	Y	Y	N	N	—	NA	No delay	0	40	Normal	—	—	—	—	—	—	—	—
		97	g2-5	Saudi	M	BTBGD	2y	NA	NA	0	homo	c.1264G>A, p.T422A	c.1264G>A, p.T422A	NA	NA	Acute, Sz	Y	NA	NA		N	N	Y	Y	Y	Y	N	N	—	NA	No delay	0	40	Normal	—	—	—	—	—	—	—	—
		98	g2-6	Saudi	F	BTBGD	10y	NA	NA	0	homo	c.1264G>A, p.T422A	c.1264G>A, p.T422A	NA	NA	Acute, Sz	Y	NA	NA		N	Y	Y	Y	Y	Y	N	N	—	NA	No delay	0	40	Mild	N	Y	N	Y	N	N	N	—
		99	g2-7	Saudi	F	BTBGD	2y	NA	NA	0	homo	c.1264G>A, p.T422A	c.1264G>A, p.T422A	NA	NA	Acute	N	NA	NA		Y	Y	Y	Y	Y	Y	N	N	—	NA	No delay	0	40	Mild	N	Y	N	Y	N	N	N	—
		100	g2-8	Saudi	F	BTBGD	10y	NA	NA	0	homo	c.1264G>A, p.T422A	c.1264G>A, p.T422A	NA	NA	SAE, Sz	Y	NA	NA		N	N	Y	Y	Y	Y	N	N	—	NA	No delay	0	40	Mild	N	Y	N	Y	N	N	N	—
		101	g2-9	Saudi	F	BTBGD	8y	NA	NA	0	homo	c.1264G>A, p.T422A	c.1264G>A, p.T422A	NA	NA	SAE, Sz	Y	NA	NA		N	N	Y	Y	Y	Y	N	N	—	NA	No delay	0	40	Mild	N	Y	N	Y	N	N	N	—
		102	g2-10	Saudi	M	BTBGD	4y	NA	NA	0	homo	c.1264G>A, p.T422A	c.1264G>A, p.T422A	NA	NA	SAE, Sz	Y	NA	NA		N	N	Y	Y	Y	Y	N	N	—	NA	No delay	0	40	Normal	—	—	—	—	—	—	—	—
22	Kensaku Kohrogi, 2015	103	1	Japan	M	BTBGD	5mo	NA	11mo	0	heter	c.464C>T, p.S155L	c.1196A>T, p.N399I	NA	NA	Opisthotonus, irritability, rigidity, progressed to coma, respiratory failure	N	Normal	Increased		N	N	Y	Y	Y	Y	N	N	Atrophy of involved regions	NA	1mo	10mg/d	100mg.d	Severe	Delayed	N	N	N	N	N	N	—
24	Juan Darı ´o Ortigoza-Escobar, 2015	104	1	Spain	M	Leigh-like	13mo	NA	14mo(Dead)	2	heter	c.1079dupT, p.L360PfsX38	c.980-14A>G, p.G327NfsX8	No	Yes	Irritability, continuous crying, hypotonia, status dystonicus, ophisthotonus, tremor, dysphagia, nystagmus, strabismus, Ataxia, weight loss, hepatomegaly, jaundice	N	Normal	Normal		N	N	Y	Y	N	N	N	N	—	Lactate peak	1mo	Yes	Yes	Death	—	—	—	—	—	—	—	Septicemia
27	Irene Flønes, 2016	105	1	Norway	F	BTBGD	13 mo	After death	15y(Dead)	0	heter	c.337T>C, p.Y113H	5’UTR promoter del_45049bp	No	No	Psychomotor regression, acute-on-chronic generalized dystonia, Sz, episodic exacerbations, no speech, dysphagia	Y	Normal	NA	Normal	N	N	Y	Y	Y	Y	N	N	—	NA	NP	No	No	Death	—	—	—	—	—	—	—	Pneunomia
		106	2	Norway	M	BTBGD	12 mo	19	19y	0	heter	c.337T>C, p.Y113H	5’UTR promoter del_45049bp	No	No	1y: Progressive encephalopathy like his sister; at 19y, severe generalized dystonia, aphonia, aphagia	N	NA	NA		—								—	NA	NA	600mg/d	600mg/d	Severe	Spastic quardriplegia	Y	N	Y	N	N	N	—
		107	3	Finland	M	BTBGD	13 mo	24	24y	0	heter	c.337T>C, p.Y113H	c.541T>C, p.S181P	No	No	13mo: generalized dystonia with subacute-onset and chronic progressive course; Sz, episodic hemiparesis followed by gradual recovery; 23y: generalized dystoni, dysarthria,	PE, GE	Normal	Normal	Normal	N	N	Y	N	Y	Y	N	N	—	NA	NA	600mg/d	600mg/d	Mild	Mild motor deficit	N	N	N	N	N	N	—
28	Aljabri MF,2016	108	1	Saudi	M	BTBGD	2.5y	2.5	2.5y	0	homo	c.1264G>A, p.T422A	c.1264G>A, p.T422A	Yes	Infection	Sudden onset ataxia, episodic of left dystonia	N	NA	NA		N	N	Y	Y	Y	Y	N	N	Complete resolution	NA	Soon	2	300mg/d	Normal	—	—	—	—	—	—	—	—
30	Sofia Ygberg, 2016	109	1	Sweeden	M	Infantile BTBGD	5wks	After death	8mo(Dead)	2	heter	c.74dupT, p.S26LfsX19	c.1403delA, p.K468RfsX30	No	No	poor feeding and reduced contact	N	Increased	Normal	Reduced ATP synthesis	Y	N	Y	Y	Y	Y	N	N	—	NA	NP	No	No	Death	—	—	—	—	—	—	—	NA
		110	2	Sweeden	M	Infantile BTBGD	6wks	NA		2	heter	c.74dupT, p.S26LfsX19	c.1403delA, p.K468RfsX30	No	No	poor feeding and reduced contact	N	Normal	Normal		Y	N	Y	Y	Y	Y	N	N	BG, cyst formation in deep gray matter	Lactate peak	NA	10	60	Moderate	Y	N	Y	Y	N	N	N	—
31	Hussein Algahtani, 2017	111	1	Saudi	F	BTBGD	0d	After death	14y(Dead)	0	homo	c.1264G>A, p.T422A	c.1264G>A, p.T422A	NA	No	Tonic Sz since birth, psychomotor delay, generalized dystonia	Tonic	Normal	Normal	Normal	—								—	NA	NP	No	No	Death	—	—	—	—	—	—	—	NA
		112	2	Saudi	F	BTBGD	0d	After death	12y(dead)	0	homo	c.1264G>A, p.T422A	c.1264G>A, p.T422A	NA	No	Sz since birth, hypotonia, psychomotor delay	Y	Normal	Normal		—								—	NA	NP	No	No	Death	—	—	—	—	—	—	—	NA
		113	3	Saudi	M	BTBGD	3y	After death	12y(dead)	0	homo	c.1264G>A, p.T422A	c.1264G>A, p.T422A	NA	No	ataxia, progressive developmental delay with loss of milestones, severe gait unsteadiness and frequent falls that progressed to a complete bedridden status, fisting of both hands with contractures at the elbows and knees with severe spasticity, hyperreflexia, muscle atropy, and bilateral upgoing toes	N	Normal	Normal		—								—	NA	NP	No	No	Death	—	—	—	—	—	—	—	NA
		114	4	Saudi	M	BTBGD	9y	15	15y	0	homo	c.1264G>A, p.T422A	c.1264G>A, p.T422A	NA	No	gradually progressive neurological dysfunction with cognitive impairment, inability to walk, speech and swallowing difficulties, dizziness, seizures, altered level of conscious- ness, quadriparesis, spasticity and rigidity with bilateral upgoing toes (Babinski sign), ankle clonus, and dystonia with flexed contractures on the upper and lower extremities	Y	Normal	Normal		Y	Y	Y	Y	Y	Y	N	N	—	NA	6y	300mg/d	300mg/d	Severe	Wheelchair bound	N	N	N	N	N	N	—
		115	5	Saudi	F	BTBGD	5y	9	9y	0	homo	c.1264G>A, p.T422A	c.1264G>A, p.T422A	NA	No	slurring of speech with buccolingual dystonia and few dystonic movements in her upper and lower extremities, gait change due to this abnormal movement with falls and unsteadiness	N	Normal	Normal		N	N	Y	N	N	N	N	N	—	NA	4y	300mg/d	300mg/d	Normal	—	—	—	—	—	—	—	—
		116	6	Saudi	F	Asymptomatic	Asymptomatic	4	4y	0	homo	c.1264G>A, p.T422A	c.1264G>A, p.T422A	NA	No	Asymptomatic		NA	NA		—								—	NA	0	300mg/d	300mg/d	Normal	—	—	—	—	—	—	—	—
32	Florian S. Eichler, 2017	117	1	America	F	BTBGD	3y	NA	20y	0	homo	c.416T>A, p.V139E	c.416T>A, p.V139E	Yes	No	3y: recurrent falls, difficulty walking and Sz; worsening dystonia and dysarthria	Y	Normal	Normal	Normal	Y	Y	Y	Y	Y	Y	N	N	BG	Lactate peak	17y	1	25	Mild	N	N	N	Episodic dystonia	N	N	N	—
33	Maciej Pronicki,2017	118	1	Poland	M	Leigh-like	3mo	After death	8mo(Dead)	2	homo	c.74dupT, p.S26LfsX19	c.74dupT, p.S26LfsX19	NA	No	3mo: Global developmental delay, spastic tetraparesisi,, progressive microcephaly and seizures；8mo: critical deterioration of the general health condition, deceased at 8 mo becaused of hypertension, hypothermia, prolonged coma, respiratory and cardiac insufficiency	Y	Normal	Normal		—								—	NA	NP	No	No	Death	—	—	—	—	—	—	—	Respiratory and car- diac insufficiency
		119	2	Poland	M	Leigh-like	12mo	1.8	4y	0	homo	c.68G>T, p.G23V	c.68G>T, p.G23V	NA	No	Hypertonia before 1 y; progressive regression, reduced contact, choking, axial hypotonia with limb hypertonia, feeding difficulties	N	Normal	Normal	complex I deficiency	N	Y	Y	Y	Y	Y	N	N	Brain atrophy, BG	NA	1y	200mg/d	5mg/d	Severe	Spastic quardriplegia	Y	Y	Y	N	N	sleep-wake phase reversal	—
34	Whitney Whitford, 2017	120	1	New Zealand	M	BTBGD	9mo	After death	20y(Dead)	0	heter	c.68G>T, p.G23V	5’UTR promoter del_4808bp	No	Infection	Sz, psychomotor regression	Y	Normal	Normal	Normal	—								—	NA	NP	No	No	Death	—	—	—	—	—	—	—	Respiratory com- plications
		121	1	New Zealand	M	BTBGD	6mo	7	7y	0	heter	c.68G>T, p.G23V	5’UTR promoter del_4808bp	No	Infection	2y: ASD, ataxia; 4y: progressive poor feeding, encephalopathy,	N	Normal	Normal	Normal	N	N	Y	Y	Y	Y	N	N	—	NA	6.5y	15	20	Severe	Quardriplegia	N	N	N	N	N	Hypotonia, dysphagia	—
35	Majid Alfadhel, 2017	122	1	Saudi	M	Leigh-like	2mo	0.25	4mo(Dead)	2	homo	c. 91dupT, p.V65GfsX160	c. 91dupT, p.V65GfsX160	Yes	Fever	Poor feeding, decreased activity, and complex partial Sz, need mechanical ventilation, nystagmus, hypotonia, clonus of limbs	PE	Increased	Normal		—								Cystic changes in cerebral hemisphere, abnormal signal in the brain stem and cerebellum	Lactate peak	1mo	10	37.5	Death	—	—	—	—	—	—	—	NA
36	Vykuntaraju K. Gowda, 2018	123	1	India	M	BTBGD	24mo	2.5	2.5y	0	homo	c.68G>T, p.G23V	c.68G>T, p.G23V	Yes	Fever	Regression of milestones, Sz, dystonia, pyramidal signs	Y	NA	NA		N	N	Y	Y	N	N	N	N	Complete resolution	NA	6mo	30mg/d	225mg/d	Normal	—	—	—	—	—	—	—	—
		124	2	India	F	Infantile spasms	12mo	1.2	14 mo	0	homo	c.68G>T, p.G23V	c.68G>T, p.G23V	Yes	No	Developmental delay, infantile spasms and regression of milestones, dystonia, opisthotonus, pyramidal signs	N	Normal	Normal		N	N	Y	Y	N	N	N	N	—	NA	2mo	30mg/d	225mg/d	No improvement	—	—	—	—	—	—	—	—
37	Davide Tonduti,2018	125	1	Italy	F	BTBGD	11mo	2	2y	0	homo	c.68G>T, p.G23V	c.68G>T, p.G23V	Yes	Infection and mild trauma	Irritability, progressive loss of milestones, generalized dystonia, elevated lactate	N	Increased	NA	Normal	N	N	Y	Y	Y	Y	N	N	BG	lactate peak	Soon	Yes	100mg/d	Normal	—	—	—	—	—	—	—	—
		126	2	Italy	M	BTBGD	2.5y	36	36y	0	heter	c.487T>C, p.S163P	c.658A>C; p.T200P	No	No	2.5y: Abnormal gait, convergent strabisums, spontaeously recovered (6 episodes); then progressed to generalized dystonia, dysarthria, intellectual disability; 14y: confusion, Sz, paroxysmal exacerbation of limbs, oro-mandibular dystonia	GE	Normal	Normal		N	Y	Y	Y	Y	Y	N	N	Brain atrophy, BG	NA	1y	0	Irregular treatment	Severe	Quardriplegia	N	Y	Y	N	Y	N	—
38	Salvatore Savasta, 2019	127	1	Eygpt	F	Leigh-like	2mo	After death	8mo(Dead)	0	homo	c.548C>T, p.A183V	c.548C>T, p.A183V	Yes	No	Refuse feeding, GTCS, elevated CSF lactate, 4mo: SE, spastic paraparesis; 4y： progressed	GTCS	Increased	Increased	Normal	Y	Y	Y	Y	Y	Y	N	N	tetraventricular hydrocephalus	NA	Soon	0	2000mg/d	Death	—	—	—	—	—	—	—	NA
		128	1.2	Eygpt	M	Leigh-like	1mo	After death	2y(Dead)	0	homo	c.548C>T, p.A183V	c.548C>T, p.A183V	Yes	No	Vomiting, clonic Sz, episodic apnea and desaturation, hypotonia, dysphagia, elevated CSF lactatd	Clonic	Increased	Increased	Normal	Y	N	Y	Y	Y	Y	Y (Internal capsule)	, thin corpus callosum	—	NA	Soon	0	900mg/d	Death	—	—	—	—	—	—	—	NA
1	Our study	129	1	Chinese	F	BTBGD	3y, 3mo	4.8	6y, 8mo	1	heter	c.265A>C, p.S89R	c.980-14A>G, p.G327NfsX8	No	Flu	Initiated as recurrent dyskinesia, hypertonia, spontaneously recovered within several days; one year later presented with vomitting, ataxia, ptosis, dysarthria, dysphagia	N	Normal	Normal		Y	N	Y	Y	Y	Y	N	N	Basal ganglia necrosis, global brain atrophy	NA	19mo	1.5	60mg/d	Normal	—	—	—	—	—	—	—	—
		130	2	Chinese	M	BTBGD	2y, 2mo	2.25	4y, 10mo	1	heter	c.842G>A, p.W281X	c.121G>A, p.G41R	No	Flu	Dull, dysarthria, ataxia, jitter of hands when grabing	N	Increased	Normal		Y	Y	Y	Y	Y	Y	Y (Corona radiata)	N	Old lesions in basal ganglia	NA	1mo	1.5	4.5	Normal	—	—	—	—	—	—	—	—
		131	3	Chinese	F	BTBGD	4mo	0.7	4y	0	homo	c.962G>A, p.A321V	c.962G>A, p.A321V	No	Febrile illness	Irritability and crying	GTCS	NA	NA		—							N	Basal ganglia necrosis, global brain atrophy	NA	4.5mo	5~10	10	Moderate	Motor delay	Delay	Y	N	N	N	N	—
		132	4	Chinese	M	Leigh-like	5mo	0.7	1y, 10mo (Dead)	1	heter	c.1198G>T, p.V400L	c.464C>A, p.S155X	No	Pneumonia	Irritability, episodic dystonia, hypertonia of limbs, followed by loss of milestones, along with sleeping disorders	N	Normal	Normal		N	Y	Y	Y	Y	N	N	N	Brain atrophy, long T1 and T2 signal in basal ganglia and cerebellum	NA	3mo	3	90mg/d	Death	—	—	—	—	—	—	—	Respiratory complications
		133	5	Chinese	F	Leigh-like	6mo	0.7	2y, 8mo	0	heter	c.901A>G, p.I301V	c.358G>A, p.E120K	No	Fever	Sleepy and dull, dystonia, hypertonia, psychomotor regression	GTCS, spasms	Increased	NA	Unremarkable	N	N	Y	Y	Y	Y	N	N	Old lesions in basal ganglia, global brain atrophy	Decreased NAA peak, slightly increased Cho peak	2mo	3	20-120mg/d	Severe	Y	N	Y	N	N	N	N	—
		134	6	Chinese	F	Leigh-like	1mo	0.25	10mo	2	heter	c.437_438insGT, p.T147SfsX62	c.437_438insGT, p.T147SfsX62	No	Vaccine	Poor feeding, generalized hypotonia followed by hypertonia, episodic jitter of limbs, choke when drinking	Spasms	Increased	NA		Y	N	Y	Y	Y	Y	N	N	Basal ganglia necrosis, global brain atrophy	NA	2mo	5~10	20-150mg/d	Severe	Y	Y	Y	N	N	N	N	—
		135	7	Chinese	F	Leigh-like	1mo	After death	7mo (Dead)	2	heter	c.816C>A p.C272X	c.1172+1G>A	No	No	Emotional alternation, vomiting	N	Increased	NA		N	N	Y	Y	Y	Y	Y (Corona radiata)	N	—	NA	NP	No	No	Death	—	—	—	—	—	—	—	Respiratory failure
		136	8	Chinese	M	Infantile spasms	3mo	0.5	1y	1	heter	c.947A>C p.N316T	c.1172+1G>A	No	No	Irritability, hypertonia, psychomotor regression	Spasms	Increased	NA		Y	Y	Y	Y	Y	Y	N	N	—	NA	2mo	10mg/d (cocktail)	100mg/d (irregularly)	Severe	Y	Y	Y	N	N	Y	Y	—
		137	9	Chinese	M	BTBGD	5mo	0.7	3y	0	heter	c.950G>A, p.G317E	c.962C>T, p.A321V	No	No	Irritability, hypertonia, psychomotor regression, hypokinesia	GTCS	Normal	Normal		N	N	Y	N	N	N	N	N	—	NA	3mo	300mg/d	20	Mild	N	N	N	N	N	N	N	—
		138	10	Chinese	M	Leigh-like	6mo	After death	2y(Dead)	1	heter	c.98C>A, p.P33Q	c.149delA, p.E50GfsX2	No	No	Irritability, psychomotor regression, frequent Szs	GTCS	Increased	NA		N	N	Y	Y	Y	Y	N	N	—	NA	NA	10mg/d	No	Death	—	—	—	—	—	—	—	Respiratory complications and frequent seizures
		139	11	Chinese	F	BTBGD	3y, 5mo	3.5y	3y, 11mo	1	heter	c.400G>T, p.E134X	c.44C>T, p.P15L	No	Viral infection	Feeding difficulties, dysmasesia, salivation and linguae tremor	N	Normal	Normal		N	N	Y	N	N	N	N	N	—	NA	1d	No	6	Normal	—	—	—	—	—	—	—	—
		140	12	Chinese	F	Infantile spasms	35d	0.2	4mo	0	homo	c.137T>C, p.L46P	c.137T>C, p.L46P	No	No	Irritability, crying and scream, dull, dystonia, poor feeding, sleeping disorder, psychomotor regression, hypokinesia	Spasms	Increased	Increased		Y	Y	Y	Y	Y	Y	N	N	Basal ganglia necrosis	NA	2weeks	3	24	Severe	Y	Y	Y	N	N	N	N	—
		141	13	Chinese	M	BTBGD	4.5mo	0.5	7mo	0	heter	c.962C>T, p.A321V	c.950G>A, p.G317E	No	No	Irritability, crying, episodic opisthotonus, hypertonia, psychomotor regression, hypokinesia	N	Normal	Normal		N	Y	Y	Y	Y	Y	N	N	Old lesions in basal ganglia and cerebellum	NA	2mo	1	10	Normal	—	—	—	—	—	—	—	—
		142	14	Chinese	M	Non-specific Developmental delay	0d	1	9mo	0	heter	c.448G>A, p.A150T	c.169C>T, p.P57S	No	No	Global developmental delay with no acute crisis	N	NA	NA		N	N	N	N	N	N	N	N	—	NA	—	—	—	Severe								—
		143	15	Chinese	F	Leigh-like	4mo	0.85	2y,6mo	1	heter	c.265A>C, p.S89R	c.1276_1278delGTA, p.V426del	No	No	Developmental regression, dystonia, nystagmus, strabismus, choking suking, microcephaly	Y	Increased	NA		Y	Y	Y	Y	Y	Y	N	Thin corpus callosum	—	NA	6mo	5~10	10~23	Severe	Y	N	Y	N	N	N	N	—
		144	16	Chinese	F	BTBGD	2y, 5mo	4.4	6y,3mo	0	heter	c.962C>T, p.A321V	c.197T>C, p.L66P	No	Fever	Episodic weakness, dysarthria, ptosis, numbness of limbs, hypertonia, hypokinesia	N	Normal	NA		N	N	Y	N	Y	Y	N	N	—	NA	1y, 10mo	5~10	8~18	Mild	N	N	N	N	N	N	Paresthesia of distal limbs	—
		145	17	Chinese	F	BTBGD	8.5mo	0.75	11y	0	heter	c.265A>C, p.S89R	c.850T>C, p.W284R	No	Fever, vaccine	Low response, developmental regression, dyskinesia, dystonia evolving into hypertonia, episodic opisthotonus	N	Normal	NA		N	Y	Y	N	N	N	N	N	—	NA	15d	5~10	10	Moderate	Delayed	N	Delayed	N	N	N	N	—
		146	18	Chinese	F	Leigh-like	1mo	Soon	2.5mo(Dead)	2	homo	The whole gene deletion	The whole gene deletion	No	Fever	Febrile convulsion, poor intake, poor spirits, generalized hypotonia	N	Increased	NA		N	N	Y	N	N	N	N	N	—	NA	2d	5~10	20	Death	—	—	—	—	—	—	—	Respiratory failure

## Sheet: Detailed clinical information
Ref	Reference	ID	Seizures	Encephalopathy	Dystonia	Hypotonia	Rigidity	Opisthotonus	Quadriparesis	Dysarthria	Dysphagia	Paralysis of 7th nerve	Nystagmus	Strabismus	Ptosis	Diplopia	Action tremor	Ataxia	Dysautonomia	Respiratory failure	Others
1	Pinar T. Ozand，1998	1	GE	Y	Y	N	Y	Y	Y	Y	Y	Y	N	N	N	N	Y	N	N	N
		2	N	N	Y	N	N	N	N	N	N	N	N	N	N	N	N	N	N	N
		3	N	Y	Y	N	Y	Y	N	Y	Y	N	N	N	N	N	N	N	N	N
		4	Y	Y	Y	N	Y	N	Y	Y	Y	Y	Y	N	N	N	Y	Y	N	N
		5	N	Y	Y	N	Y	N	N	N	N	N	N	N	N	N	N	N	N	N
		6	N	N	Y	N	Y	N	Y	Y	Y	Y	Y	N	N	N	N	N	N	N
5	Satoshi Kono, 2009	7	Complex PE, SE	N	Y	N	N	N	N	N	N	N	Y	N	N	Y	N	Y	N	N
		8	Complex PE, SE	N	Y	N	N	N	N	N	N	N	Y	N	N	Y	N	Y	N	N
6	Rabab Debs, 2010	9	GE	Y	Y	Y	Y	N	N	Y	N	N	Y	N	Y	N	Y	N	Y	N	Paresthesia, vertigo
		10	PE, GE	Y	Y	Y	N	N	N	Y	Y	N	N	N	N	N	Y	N	N	N
7	Kenichiro Yamada, 2010	11	Spasms, GE	Y	N	Y	N	Y	N	N	Y	N	N	N	N	N	N	N	N	N
		12	Spasms, GE	Y	N	Y	N	N	N	N	Y	N	N	N	N	N	N	N	N	Y
		13	Spasms, GE	Y	N	Y	N	Y	N	N	Y	N	N	N	N	N	N	N	N	Y
		14	Spasms, PE	Y	N	Y	N	Y	N	N	Y	N	N	N	N	N	N	N	N	N
8	Mercedes Serrano, 2012	15	N	Y	Y	N	Y	Y	Y	Y	N	N	Y	N	N	N	Y	N	N	N
		16	N	Y	Y	N	N	N	N	Y	Y	N	N	N	N	N	N	N	Y loss of sphincter control	N
10	Brahim Tabarki, 2013	17	Y	Y	Y	N	Y	NA	Y	N	N	N	N	N	N	N	N	Y	N	N
		18	N	Y	Y	N	Y	NA	Y	N	N	N	N	N	N	N	N	Y	N	N
		19	Y	Y	Y	N	Y	NA	Y	Y	N	N	N	N	N	N	N	Y	N	N
		20	Y	Y	Y	N	Y	NA	Y	N	Y	N	N	N	N	N	N	Y	N	N
		21	N	Y	Y	N	Y	NA	Y	Y	N	N	N	N	N	N	N	Y	N	N
		22	Y	Y	Y	N	Y	NA	Y	N	N	N	N	N	N	N	N	Y	N	N
		23	Y	Y	Y	N	Y	NA	Y	N	N	N	N	N	N	N	N	N	N	N
		24	Y	Y	Y	N	Y	NA	Y	Y	N	N	N	N	N	N	N	Y	N	N
		25	Y	N	Y	N	Y	NA	Y	N	N	N	N	N	N	N	N	N	N	N
		26	Y	Y	Y	N	Y	NA	Y	N	N	N	N	N	N	N	N	N	N	N
11	Belén Pérez-Dueñas，2013	27	N	Y	N	N	N	Y	N	N	Y	N	N	N	N	N	N	N	N	N	Vomit
12	Mike Gerards, 2013	28	Y	Y	N	Y	Y	Y	Y	N	N	N	Y	N	N	N	N	N	N	Y
		29	N	Y	N	Y	N	N	N	N	N	N	Y	N	N	N	N	N	N	Y	Sun-set phenomenon
		30	N	Y	N	Y	N	Y	N	N	Y	N	N	N	N	N	N	N	N	Y
		31	N	Y	N	Y	N	N	N	N	Y	N	N	N	N	N	Y	N	N	Y
		32	Y	Y	N	Y	N	N	N	N	Y	N	N	N	Y	N	N	N	N	Y
		33	N	Y	Y	Y	N	Y	N	N	N	N	N	N	N	N	N	N	N	Y
		34	NA	NA	NA	NA	NA	NA	NA	NA	NA	NA	NA	NA	NA	NA	NA	NA	NA	Y
		35	NA	NA	NA	NA	NA	NA	NA	NA	NA	NA	NA	NA	NA	NA	NA	NA	NA	Y
		36	Y	Y	Y	Y	N	N	N	N	Y	N	N	N	N	N	N	N	N	Y
13	Felix Distelmaier, 2013	37	N	Y	Y	N	N	N	N	Y	N	N	N	N	N	N	N	N	N	N
14	Elisa Fassone, 2013	38	N	N	Y	N	Y	N	N	Y	Y	N	N	N	Y	N	N	N	Y-Dysuria	N
15	Sietske H. Kevelam, 2013	39	N	Y	N	Y	N	Y	N	Y	Y	N	N	N	N	N	N	Y	N	Y	Liver disease
		40	N	Y	Y	N	Y	Y	Y	N	N	N	N	N	N	N	N	N	N	Y
		41	N	Y	N	Y	N	N	N	N	Y	N	N	N	N	N	N	N	N	Y	N
		42	N	Y	N	Y	N	N	N	N	N	N	N	N	N	N	N	N	N	Y
		43	Y	Y	N	Y	N	N	N	N	N	N	N	N	N	N	N	N	N	Y
		44	N	Y	N	Y	N	N	N	N	N	N	N	N	N	N	N	N	N	N
		45	Y	Y	N	Y	N	N	N	N	N	N	N	N	N	N	N	N	N	Y
16	Majid Alfadhel, 2013	46	Y	Y	Y	N	NA	NA	NA	Y	NA	NA	NA	NA	NA	NA	NA	Y	NA	NA
		47	Y	Y	N	N	NA	NA	NA	N	NA	NA	NA	NA	NA	NA	NA	N	NA	NA
		48	Y	Y	Y	N	NA	NA	NA	N	NA	NA	NA	NA	NA	NA	NA	N	NA	NA
		49	Y	Y	Y	N	NA	NA	NA	Y	NA	NA	NA	NA	NA	NA	NA	Y	NA	NA
		50	Y	Y	Y	N	NA	NA	NA	Y	NA	NA	NA	NA	NA	NA	NA	Y	NA	NA
		51	Y	Y	Y	N	NA	NA	NA	Y	NA	NA	NA	NA	NA	NA	NA	Y	NA	NA
		52	Y	Y	Y	N	NA	NA	NA	Y	NA	NA	NA	NA	NA	NA	NA	Y	NA	NA
		53	Y	Y	Y	N	NA	NA	NA	Y	NA	NA	NA	NA	NA	NA	NA	Y	NA	NA
		54	Y	Y	N	N	NA	NA	NA	N	NA	NA	NA	NA	NA	NA	NA	N	NA	NA
		55	Y	Y	Y	N	NA	NA	NA	N	NA	NA	NA	NA	NA	NA	NA	N	NA	NA
		56	Y	Y	N	N	NA	NA	NA	Y	NA	NA	NA	NA	NA	NA	NA	Y	NA	NA
		57	Y	Y	N	N	NA	NA	NA	N	NA	NA	NA	NA	NA	NA	NA	N	NA	NA
		58	Y	Y	N	N	NA	NA	NA	Y	NA	NA	NA	NA	NA	NA	NA	Y	NA	NA
		59	N	Y	Y	N	NA	NA	NA	Y	NA	NA	NA	NA	NA	NA	NA	Y	NA	NA
		60	N	Y	Y	N	NA	NA	NA	Y	NA	NA	NA	NA	NA	NA	NA	Y	NA	NA
		61	N	Y	Y	N	NA	NA	NA	Y	NA	NA	NA	NA	NA	NA	NA	Y	NA	NA
		62	N	Y	N	N	NA	NA	NA	N	NA	NA	NA	NA	NA	NA	NA	Y	NA	NA
		63	N	Y	N	N	NA	NA	NA	N	NA	NA	NA	NA	NA	NA	NA	Y	NA	NA
17	H. Kassem, 2014	64	NA	Y	NA	NA	NA	NA	NA	NA	NA	NA	NA	NA	NA	NA	NA	NA	NA	NA
		65	NA	Y	NA	NA	NA	NA	NA	NA	NA	NA	NA	NA	NA	NA	NA	NA	NA	NA
		66	NA	Y	NA	NA	NA	NA	NA	NA	NA	NA	NA	NA	NA	NA	NA	NA	NA	NA
		67	NA	Y	NA	NA	NA	NA	NA	NA	NA	NA	NA	NA	NA	NA	NA	NA	NA	NA
		68	NA	Y	NA	NA	NA	NA	NA	NA	NA	NA	NA	NA	NA	NA	NA	NA	NA	NA
		69	NA	Y	NA	NA	NA	NA	NA	NA	NA	NA	NA	NA	NA	NA	NA	NA	NA	NA
		70	NA	Y	NA	NA	NA	NA	NA	NA	NA	NA	NA	NA	NA	NA	NA	NA	NA	NA
		71	NA	Y	NA	NA	NA	NA	NA	NA	NA	NA	NA	NA	NA	NA	NA	NA	NA	NA
		72	NA	Y	NA	NA	NA	NA	NA	NA	NA	NA	NA	NA	NA	NA	NA	NA	NA	NA
		73	NA	Y	NA	NA	NA	NA	NA	NA	NA	NA	NA	NA	NA	NA	NA	NA	NA	NA
		74	NA	Y	NA	NA	NA	NA	NA	NA	NA	NA	NA	NA	NA	NA	NA	NA	NA	NA
		75	NA	Y	NA	NA	NA	NA	NA	NA	NA	NA	NA	NA	NA	NA	NA	NA	NA	NA
		76	NA	Y	NA	NA	NA	NA	NA	NA	NA	NA	NA	NA	NA	NA	NA	NA	NA	NA
		77	NA	Y	NA	NA	NA	NA	NA	NA	NA	NA	NA	NA	NA	NA	NA	NA	NA	NA
		78	NA	Y	NA	NA	NA	NA	NA	NA	NA	NA	NA	NA	NA	NA	NA	NA	NA	NA
18	Anne Schänzer, 2014	79	Mutical focal Sz, SE	Y	Y	N	N	Y	Y	Y	Y	N	N	N	N	Y	N	Y	N	N	Liver disease
		80	SE	Y	Y	N	N	N	Y	Y	Y	N	N	N	N	N	N	Y	N	Y	Chorea
19	L.J. Sremba, 2014	81	Myoclonic Sz, spasms	Y	N	Y	N	N	Y	N	Y	N	Y	N	N	N	N	N	N	Y
20	Tobias B. Haack, 2014	82	Y	Y	NA	NA	NA	NA	NA	NA	NA	NA	NA	NA	NA	NA	NA	NA	NA	NA	Vomit
21	Brahim Tabarki, 2015	83	Y	Y	Y	N	N	NA	NA	NA	N	NA	NA	NA	NA	NA	NA	Y	NA	NA
		84	N	Y	Y	N	NA	NA	NA	N	N	NA	NA	NA	NA	NA	NA	Y	NA	NA
		85	Y	Y	N	N	NA	NA	NA	N	N	NA	NA	NA	NA	NA	NA	Y	NA	NA
		86	Y	Y	Y	N	NA	NA	NA	N	N	NA	NA	NA	NA	NA	NA	Y	NA	NA
		87	N	Y	Y	N	NA	NA	NA	N	N	NA	NA	NA	NA	NA	NA	Y	NA	NA
		88	Y	Y	Y	N	NA	NA	NA	Y	N	NA	NA	NA	NA	NA	NA	Y	NA	NA
		89	Y	Y	Y	N	NA	NA	NA	N	N	NA	NA	NA	NA	NA	NA	N	NA	NA
		90	Y	Y	N	N	NA	NA	NA	N	N	NA	NA	NA	NA	NA	NA	N	NA	NA
		91	Y	Y	N	N	NA	NA	NA	N	N	NA	NA	NA	NA	NA	NA	N	NA	NA
		92	Y	Y	Y	N	NA	NA	NA	N	N	NA	NA	NA	NA	NA	NA	N	NA	NA
		93	Y	Y	N	N	NA	NA	NA	N	N	NA	NA	NA	NA	NA	NA	N	NA	NA
		94	Y	Y	N	N	NA	NA	NA	N	N	NA	NA	NA	NA	NA	NA	N	NA	NA
		95	Y	Y	N	N	NA	NA	NA	N	N	NA	NA	NA	NA	NA	NA	N	NA	NA
		96	Y	Y	Y	N	NA	NA	NA	N	N	NA	NA	NA	NA	NA	NA	N	NA	NA
		97	Y	Y	N	N	NA	NA	NA	N	N	NA	NA	NA	NA	NA	NA	N	NA	NA
		98	Y	Y	N	N	NA	NA	NA	N	N	NA	NA	NA	NA	NA	NA	N	NA	NA
		99	N	Y	N	N	NA	NA	NA	N	N	NA	NA	NA	NA	NA	NA	N	NA	NA
		100	Y	Y	N	N	NA	NA	NA	N	N	NA	NA	NA	NA	NA	NA	N	NA	NA
		101	Y	Y	N	N	NA	NA	NA	N	N	NA	NA	NA	NA	NA	NA	N	NA	NA
		102	Y	Y	N	N	NA	NA	NA	N	N	NA	NA	NA	NA	NA	NA	N	NA	NA
22	Kensaku Kohrogi, 2015	103	N	Y	Y	Y	Y	Y	Y	N	Y	N	N	N	N	N	N	N	N	Y
24	Juan Darı ´o Ortigoza-Escobar, 2015	104	N	Y	Y	Y	Y	Y	Y	N	Y	N	Y	Y	N	N	Y	Y	N	N	Hepatomegaly
27	Irene Flønes, 2016	105	Y	Y	Y	N	N	N	N	Y	Y	N	N	N	N	N	N	N	N	N
		106	N	Y	Y	N	N	N	N	Y	Y	N	N	N	N	N	N	N	N	N
		107	PE, GE	N	Y	N	N	N	N	Y	N	N	N	N	N	N	N	N	N	N
28	Aljabri MF,2016	108	N	N	Y	N	N	N	N	N	N	N	N	N	N	N	N	Y	N	N
30	Sofia Ygberg, 2016	109	N	Y	NA	NA	NA	NA	NA	NA	Y	NA	NA	NA	NA	NA	NA	NA	NA	NA
		110	N	Y	NA	NA	NA	NA	NA	NA	Y	NA	NA	NA	NA	NA	NA	NA	NA	NA
31	Hussein Algahtani, 2017	111	Tonic	N	Y	N	Y	N	N	N	N	N	N	N	N	N	N	N	N	N
		112	Y	N	N	Y	Y	N	N	N	N	N	N	N	N	N	N	N	N	N
		113	N	N	N	N	N	N	N	N	N	N	N	N	N	N	N	Y	N	N
		114	Y	Y	Y	N	Y	N	Y	Y	Y	N	N	N	N	N	N	N	N	N	Dizziness
		115	N	N	Y	N	N	N	N	Y	N	N	N	N	N	N	N	N	N	N
		116
32	Florian S. Eichler, 2017	117	Y	N	Y	N	N	N	N	Y	N	N	N	N	N	N	N	N	N	N
33	Maciej Pronicki,2017	118	Y	Y	Y	N	Y	N	Y	N	Y	N	N	N	N	N	N	N	N	Y
		119	N	Y	Y	Y	Y	N	N	N	Y	N	N	N	N	N	N	N	N	N
34	Whitney Whitford, 2017	120	Y	Y	Y	N	N	N	Y	Y	Y	N	N	N	N	N	N	N	N	Y
		121	N	Y	N	Y	N	N	N	Y	Y	N	N	N	N	N	N	Y	N	N
35	Majid Alfadhel, 2017	122	PE	Y	N	Y	Y	N	N	N	Y	N	Y	N	N	N	N	N	N	Y	Clonus of limbs
36	Vykuntaraju K. Gowda, 2018	123	Y	N	Y	N	Y	N	N	N	N	N	N	N	N	N	N	N	N	N
		124	N	Y	Y	N	Y	Y	N	N	N	N	N	N	N	N	N	N	N	N
37	Davide Tonduti,2018	125	N	N	Y	N	Y	N	N	N	N	N	N	N	N	N	N	N	N	N
		126	GE	Y	Y	N	Y	N	N	Y	Y	N	N	Y	N	N	N	N	N	N
38	Salvatore Savasta, 2019	127	GTCS	Y	Y	Y	Y	Y	Y	N	Y	N	N	N	N	N	N	N	N	N	Hydrocephalus, hepatomegaly, dolichocolon, scoliosis
		128	Clonic	Y	N	Y	N	N	N	N	Y	N	N	N	N	N	N	N	N	Y
1	Our study	129	N	N	Y	N	Y	N	N	Y	Y	N	N	N	Y	N	N	Y	N	N
		130	N	Y	Y	N	Y	N	N	Y	N	N	N	N	N	N	Y	Y	N	N
		131	GTCS	Y	N	N	N	N	N	N	Y	N	N	N	N	N	N	N	N	N
		132	N	Y	Y	Y	Y	Y	N	N	Y	N	N	N	N	N	N	N	N	Y	Sleeping disorder
		133	GTCS, spasms	Y	Y	Y	Y	N	Y	N	Y	N	N	N	N	N	N	N	N	N
		134	Spasms	Y	N	Y	Y	N	Y	N	Y	N	N	N	N	N	N	N	N	N
		135	N	Y	N	Y	N	N	N	N	Y	N	N	N	N	N	N	N	N	Y	Vomit
		136	Spasms	Y	N	Y	Y	N	N	N	Y	N	N	N	N	N	N	N	N	N
		137	GTCS	Y	N	N	Y	N	N	N	N	N	N	N	N	N	N	N	N	N
		138	GTCS	Y	N	Y	Y	N	N	N	Y	N	N	N	N	N	N	N	N	Y
		139	N	N	N	N	N	N	N	Y	N	N	N	N	N	N	Y	Y	N	N	dysmasesia
		140	Spasms	Y	Y	N	Y	Y	N	N	Y	N	N	N	N	N	N	N	N	N	Sleeping disorder
		141	N	Y	Y	N	Y	Y	N	N	N	N	N	N	N	N	N	N	N	N
		142	N
		143	Y	Y	Y	N	Y	N	N	N	Y	N	Y	Y	N	N	N	N	N	N
		144	N	N	Y	N	N	N	N	Y	N	N	N	N	N	N	N	N	N	N	Limb paresthesia
		145	N	Y	Y	N	Y	Y	N	N	N	N	N	N	N	N	N	N	N	N
		146	N	Y	N	Y	N	N	N	N	Y	N	N	N	N	N	N	N	N	Y
